# Supplementary material
Source: PubMed Central journal article supplement (PMC3426654)
Supplement: NIHMS383237-supplement-1_si_001.pdf [file NIHMS383237-supplement-1_si_001.pdf]

## Supporting Information

# Crystal Structures of *Trypanosoma cruzi* UDP-Galactopyranose Mutase Implicate Flexibility of the Histidine Loop in Enzyme Activation

This research was supported by NIH grant R01 GM094468 (to P.S. and J.J.T).

Richa Dhatwalia,<sup>†,||</sup> Harkewal Singh,<sup>†,||</sup> Michelle Oppenheimer,<sup>#</sup> Pablo Sobrado,<sup>#</sup>

and John J. Tanner<sup>†,‡,\*</sup>

<sup>†</sup>Department of Chemistry, University of Missouri-Columbia, Columbia, MO 65211, USA

<sup>#</sup>Department of Biochemistry, Virginia Tech, Blacksburg, VA 24061, USA

<sup>‡</sup>Department of Biochemistry, University of Missouri-Columbia, Columbia, MO 65211,  
USA

<sup>||</sup>These authors contributed equally to this work.

### Corresponding author

Department of Chemistry, University of Missouri-Columbia, Columbia, MO 65211, USA;

email: [tannerjj@missouri.edu](mailto:tannerjj@missouri.edu); phone: 573-884-1280; fax: 573-882-2754

## **Table of Contents**

**Figure S1.** Steady-state kinetic characterization of TcUGM and histidine loop mutants. S-3

**Figure S2.** Structure of the AfUGM tetramer. S-4

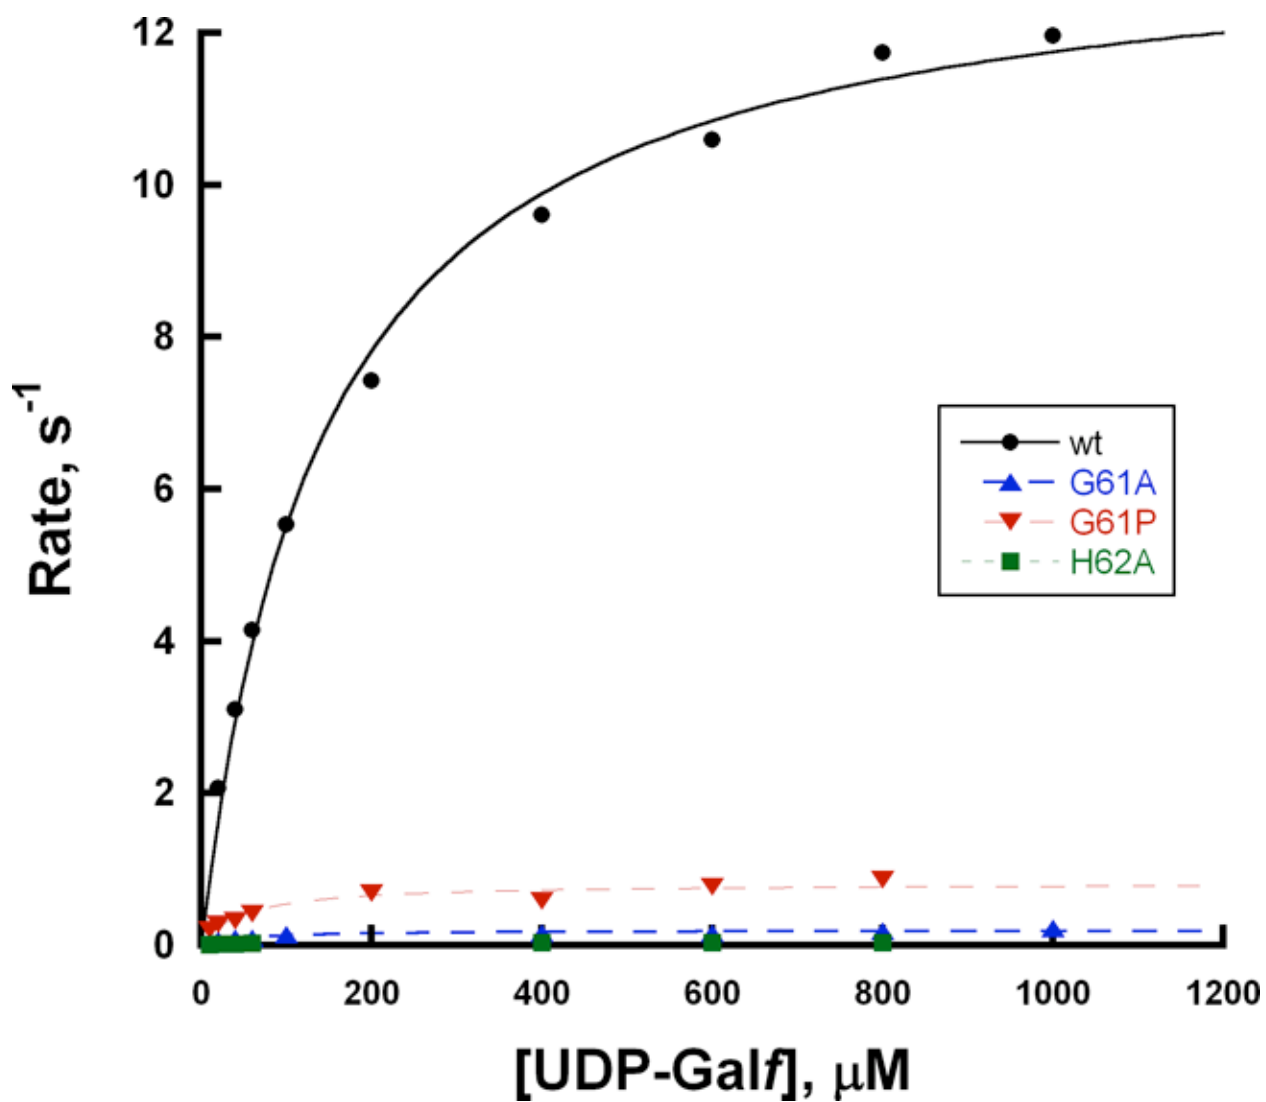

**Figure S1.** Steady-state kinetic characterization of TcUGM and the TcUGM histidine loop mutants G61A, G61P, and H62A. The activity was determined by monitoring the formation UDP-Galp from UDP-Galf. The data were fit to the Michaelis-Menten equation.

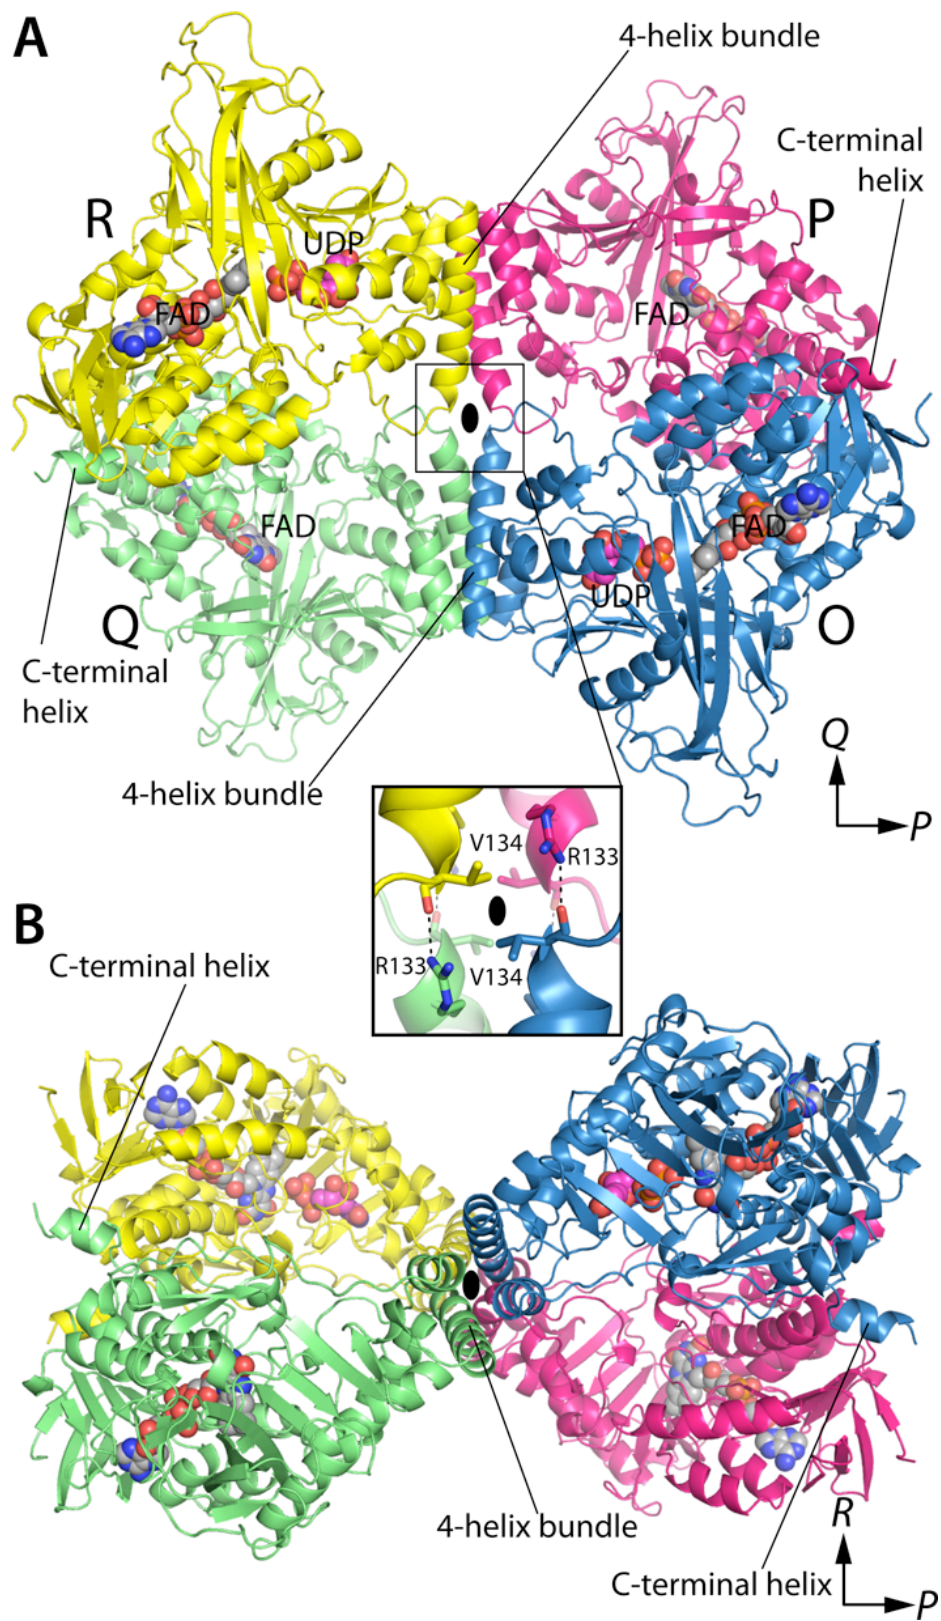

**Figure S2.** Structure of the AfUGM tetramer. (A) The tetramer is viewed down the *R* molecular 2-fold axis. Each chain has a different color. Inset: Intersubunit hydrogen bonds formed by Arg133 at the intersection of molecular 2-fold axes. (B) The tetramer is viewed down the *Q*-axis.
